# Supplementary material for: A library mobile device deployment to enhance the medical student experience in a rural longitudinal integrated clerkship
Source: J Med Libr Assoc. 2019 Jan 1;107(1):30–42. doi: 10.5195/jmla.2019.442 (PMC6300226; doi:10.5195/jmla.2019.442)
Supplement: Appendix A [file jmla-107-30-s001.pdf]

## A library mobile device deployment to enhance the medical student experience in a rural longitudinal integrated clerkship

Emily M. Johnson, AHIP; Carmen Howard

### APPENDIX A

#### Survey instrument

#### Rural Information Connection: pre-rotation survey

Survey introduction:

This survey will take you approximately 15 minutes to complete. Information from this survey will be used to evaluate and improve the implementation of the Rural Information Connection pilot project. Although we request your name to facilitate pre/post comparisons, your identity and responses will be kept confidential.

Thank you for participating!

Name: \_\_\_\_\_

Date: \_\_\_\_\_

What is your gender?

- A. Male
- B. Female
- C. Do not want to disclose

What is your ethnicity? [Please circle all that apply]

- A. American Indian or Alaska Native
- B. Asian
- C. Black or African American
- D. Hispanic or Latino/a
- E. Native Hawaiian or Other Pacific Islander
- F. White
- G. Other

What technology do you currently own?

| Technology                                     | Yes | No | Don't know | Type/Brand? [Write in response] |
|------------------------------------------------|-----|----|------------|---------------------------------|
| A. Desktop computer?                           |     |    |            |                                 |
| B. Laptop computer?                            |     |    |            |                                 |
| C. Smartphone with Internet browsing ability?  |     |    |            |                                 |
| D. Tablet device (netbook, iPad, Kindle, etc.) |     |    |            |                                 |

How do you expect to use the iPad during the rotation? [Circle all that apply]

- A. Read clinical information on the iPad
- B. Take notes
- C. Answer clinical questions
- D. Log into the electronic health record (EHR)
- E. Review labs on rounds
- F. Complete other medical school activities
- G. Show information to patients
- H. Show information to attending physicians/residents
- I. Non-course related activities
- J. Other [Please specify] \_\_\_\_\_

### Health sciences resource use

Which of the following databases/clinical tools have you previously used on any platform (i.e., computer, tablet, smartphone)?

| Databases/clinical tools              | Yes | No | I do not know what this resource is |
|---------------------------------------|-----|----|-------------------------------------|
| AccessMedicine                        |     |    |                                     |
| ACP Clinical Practice Guidelines      |     |    |                                     |
| ACP Immunization Advisor              |     |    |                                     |
| AFP by Topic                          |     |    |                                     |
| AIDSinfo Mobile                       |     |    |                                     |
| American Academy of Family Physicians |     |    |                                     |
| ASCVD                                 |     |    |                                     |
| Browzine                              |     |    |                                     |
| Calculate by QxMD                     |     |    |                                     |
| Canopy Medical Translator             |     |    |                                     |
| CDC                                   |     |    |                                     |
| Citrix                                |     |    |                                     |
| ClinicalKey                           |     |    |                                     |
| Clinical Pharmacology                 |     |    |                                     |
| DailyMed                              |     |    |                                     |
| Drugs.com                             |     |    |                                     |
| DynaMed                               |     |    |                                     |
| Embryo                                |     |    |                                     |
| Epocrates Basic                       |     |    |                                     |
| ePSS                                  |     |    |                                     |
| Figure 1                              |     |    |                                     |
| GoodRX                                |     |    |                                     |
| Kindle                                |     |    |                                     |
| LactMed                               |     |    |                                     |
| LexiComp                              |     |    |                                     |
| MDCalc                                |     |    |                                     |
| Medical Letter                        |     |    |                                     |
| MedlinePlus                           |     |    |                                     |
| Medscape                              |     |    |                                     |
| MicroMedex                            |     |    |                                     |
| Omnio                                 |     |    |                                     |
| PHPartners                            |     |    |                                     |
| Prognosis                             |     |    |                                     |

| Databases/clinical tools | Yes | No | I do not know what this resource is |
|--------------------------|-----|----|-------------------------------------|
| PubMedMobile             |     |    |                                     |
| Read by QxMD             |     |    |                                     |
| TouchSurgery             |     |    |                                     |
| TOXNET Mobile            |     |    |                                     |
| UpToDate                 |     |    |                                     |
| UWorld USMLE             |     |    |                                     |
| WebMD for iPads          |     |    |                                     |
| YouTube                  |     |    |                                     |

What additional databases or clinical tools would you like to see on the iPad for your use?

---

### Technology use questions

Definition: Information gathering: technology use for the purpose of finding needed information

In an average month in medical school, I use technology for information gathering purposes...

- A. Daily
- B. A couple days a week
- C. Weekly
- D. Monthly
- E. Never
- F. X. Unclear if this applies to me

What is the primary device you used for information gathering purposes?

- A. Desktop computer
- B. Laptop computer
- C. Smartphone device
- D. Tablet device
- E. Other [Please specify] \_\_\_\_\_

Overall, technology makes my life easier.

- A. Strongly agree
- B. Agree
- C. Neither agree nor disagree
- D. Disagree
- E. Strongly disagree

I feel I accomplish more in my academic clinical life because of technology.

- A. Strongly agree
- B. Agree
- C. Neither agree nor disagree
- D. Disagree
- E. Strongly disagree

If I don't use technology for a week, I feel bothered or out of sorts.

- A. Strongly agree
- B. Agree
- C. Neither agree nor disagree
- D. Disagree
- E. Strongly disagree

Given my use of all technologies at my disposal, on average I feel I am a(n):

- A. Expert user
- B. Advanced user
- C. Intermediate user
- D. Basic user
- E. Non-technology user

### **Rural Information Connection: post-rotation survey**

#### Survey introduction:

This survey is a follow-up to the technology use survey you completed at the beginning of the rotation. It is intended to update information on your use of technology and the iPad over the rotation. Information from this survey will be used to evaluate and improve the implementation of the Rural Information Connection pilot project.

Although we request your name to facilitate pre/post comparisons, your identity and responses will be kept confidential.

This survey takes approximately 25 minutes to complete.

Thank you for participating!

Name: \_\_\_\_\_

Date: \_\_\_\_\_

Did you use the iPad during your rotation?

- A. Yes
- B. No

How often did you use the iPad?

- A. Daily
- B. A couple days a week
- C. Weekly
- D. Monthly
- E. Never
- F. X. Unclear if this applies to me

How did you use the iPad during the rotation? [Circle all that apply]

- A. Read clinical information on the iPad
- B. Took notes
- C. Answered clinical questions
- D. Logged into EHR
- E. Reviewed labs on rounds
- F. Completed other medical school assigned activities
- G. Showed information to patients
- H. Showed information to attending physicians/residents
- I. Non-course related activities
- J. Other [Please specify] \_\_\_\_\_

## Technology Acceptance Model section

### Technology Acceptance Model questionnaire

| Scale                                                                                 | Likely    |       |          | Neutral | Unlikely |       |           |
|---------------------------------------------------------------------------------------|-----------|-------|----------|---------|----------|-------|-----------|
|                                                                                       | Extremely | Quite | Slightly | Neither | Slightly | Quite | Extremely |
| Using the iPad in my work helps me to accomplish tasks more quickly                   |           |       |          |         |          |       |           |
| Using the iPad improves my work performance                                           |           |       |          |         |          |       |           |
| Using the iPad increases my work productivity                                         |           |       |          |         |          |       |           |
| Using the iPad enhances my effectiveness at work                                      |           |       |          |         |          |       |           |
| Using the iPad makes it easier to do my work                                          |           |       |          |         |          |       |           |
| I find the iPad useful in my work                                                     |           |       |          |         |          |       |           |
| Learning to operate the iPad has been easy for me                                     |           |       |          |         |          |       |           |
| I find it easy to get the iPad to do what I want it to do                             |           |       |          |         |          |       |           |
| My interaction with the iPad is clear and understandable                              |           |       |          |         |          |       |           |
| I find the iPad to be flexible to interact with                                       |           |       |          |         |          |       |           |
| It is easy for me to become skillful at using the iPad                                |           |       |          |         |          |       |           |
| I find the iPad easy to use                                                           |           |       |          |         |          |       |           |
| I use my iPad very frequently (many times per week)                                   |           |       |          |         |          |       |           |
| I use my iPad for a variety of purposes (clinical notes, reports, medical info, etc.) |           |       |          |         |          |       |           |

## Health sciences resource use section

Which of the following databases/clinical tools have you used during your rotation on the iPad?

| Databases/clinical tools              | More than once per week | Once per week | Once during the term | Never |
|---------------------------------------|-------------------------|---------------|----------------------|-------|
| AccessMedicine                        |                         |               |                      |       |
| ACP Clinical Practice Guidelines      |                         |               |                      |       |
| ACP Immunization Advisor              |                         |               |                      |       |
| AFP by Topic                          |                         |               |                      |       |
| AIDSinfo Mobile                       |                         |               |                      |       |
| American Academy of Family Physicians |                         |               |                      |       |
| ASCVD                                 |                         |               |                      |       |
| Browzine                              |                         |               |                      |       |
| Calculate by QxMD                     |                         |               |                      |       |
| Canopy Medical Translator             |                         |               |                      |       |
| CDC                                   |                         |               |                      |       |
| Citrix                                |                         |               |                      |       |
| ClinicalKey                           |                         |               |                      |       |
| Clinical Pharmacology                 |                         |               |                      |       |
| DailyMed                              |                         |               |                      |       |
| Drugs.com                             |                         |               |                      |       |
| DynaMed                               |                         |               |                      |       |
| Embryo                                |                         |               |                      |       |
| Epocrates Basic                       |                         |               |                      |       |
| ePSS                                  |                         |               |                      |       |
| Figure 1                              |                         |               |                      |       |
| GoodRX                                |                         |               |                      |       |
| Kindle                                |                         |               |                      |       |
| LactMed                               |                         |               |                      |       |
| LexiComp                              |                         |               |                      |       |
| MDCalc                                |                         |               |                      |       |
| Medical Letter                        |                         |               |                      |       |
| MedlinePlus                           |                         |               |                      |       |
| Medscape                              |                         |               |                      |       |
| MicroMedex                            |                         |               |                      |       |
| Omnio                                 |                         |               |                      |       |
| PHPartners                            |                         |               |                      |       |
| Prognosis                             |                         |               |                      |       |
| PubMedMobile                          |                         |               |                      |       |
| Read by QxMD                          |                         |               |                      |       |
| TouchSurgery                          |                         |               |                      |       |
| TOXNET Mobile                         |                         |               |                      |       |
| UpToDate                              |                         |               |                      |       |
| UWorld USMLE                          |                         |               |                      |       |
| WebMD for iPads                       |                         |               |                      |       |
| YouTube                               |                         |               |                      |       |

What additional databases or clinical tools would you have liked to see on the iPad for your use?

---

Please provide at least one example of which you feel your use of the iPad was effective in this rotation.

---

Please provide at least one example of which you feel your use of the iPad was ineffective or was limited in completing a task in your rotation.

---

### Technology use questions

1. In an average month in medical school, I use technology for information gathering purposes...
  - A. Daily
  - B. Weekly
  - C. Less than weekly
  - D. Never
  - E. Unclear if this applies to me
2. What is the primary device you used for information gathering purposes?
  - A. Desktop computer
  - B. Laptop computer
  - C. Smartphone device
  - D. Tablet device
  - E. Other [Please specify] \_\_\_\_\_
3. Overall, technology makes my life easier.
  - A. Strongly agree
  - B. Agree
  - C. Neither agree nor disagree
  - D. Disagree
  - E. Strongly disagree
4. I feel I accomplish more in my academic clinical life because of technology.
  - A. Strongly agree
  - B. Agree
  - C. Neither agree nor disagree
  - D. Disagree
  - E. Strongly disagree
5. If I don't use technology for a week, I feel bothered or out of sorts.
  - A. Strongly agree
  - B. Agree
  - C. Neither agree nor disagree
  - D. Disagree
  - E. Strongly disagree

6. Given my use of all technologies at my disposal, on average I feel I am a(n):

- F. Expert user
- G. Advanced user
- H. Intermediate user
- I. Basic user
- J. Non-technology user
